# Supplementary material for: Increasing Yield of 2,3,5,6-Tetramethylpyrazine in Baijiu Through Saccharomyces cerevisiae Metabolic Engineering
Source: PubMed Central journal article supplement (PMC7726194; doi:10.3389/fmicb.2020.596306), 2020-11-26
Supplement: Image_1.pdf [file Image_1.pdf]

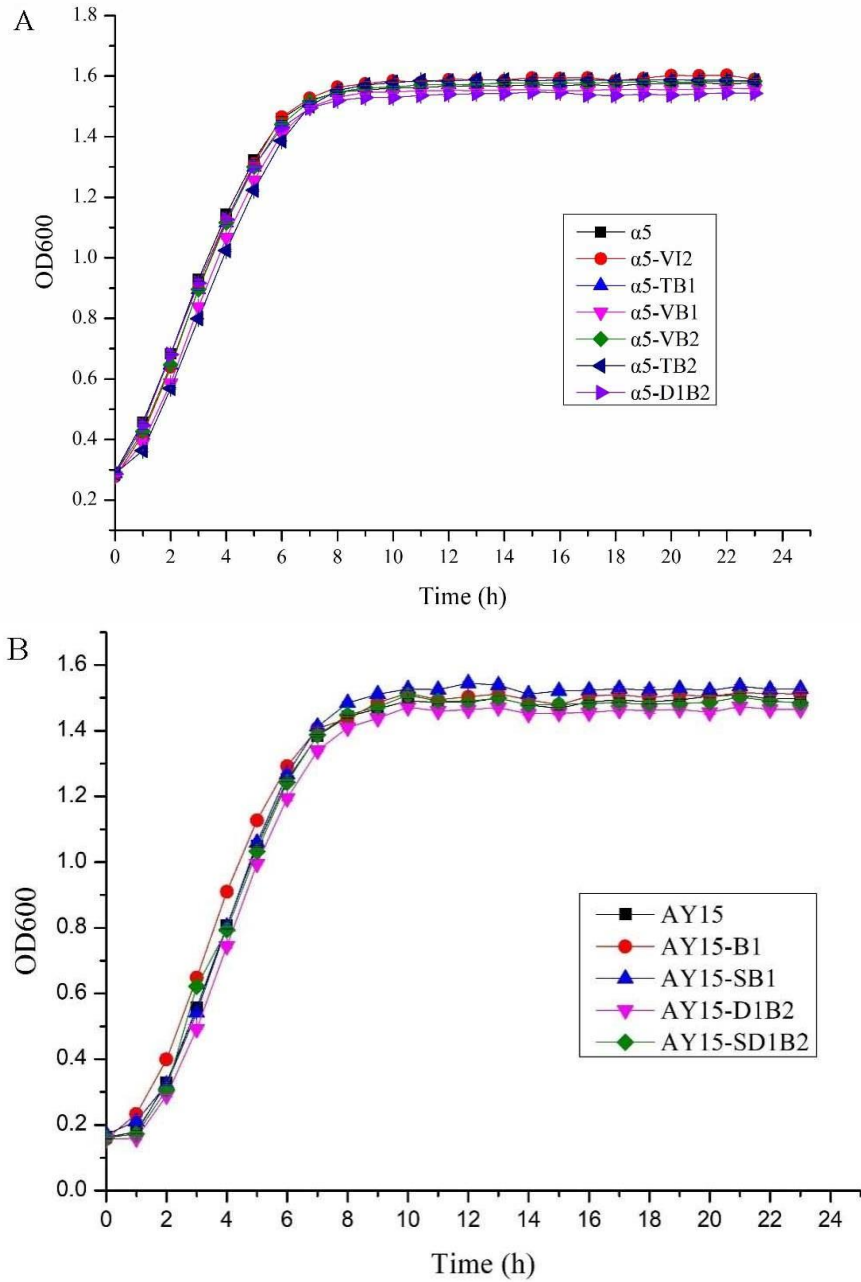

Supplementary Figure 1. Growth curve of haploid strains and diploid strains

A: The growth curves of  $\alpha$ -type haploid recombinants and  $\alpha 5$ .

B: The growth curves of diploid recombinants and AY15.

Data represent the mean of three independent biological replicates. Error bars represent the SD of the average values.
